# Supplementary material for: Scalable synthesis of a dual-confined SiO/one-dimensional carbon/amorphous carbon anode based on heterogeneous carbon structure evolution
Source: Royal Society of Chemistry journal article supplement (doi:10.1039/d1ta07821f), 2021-01-01
Supplement: d1ta07821f1.pdf [file d1ta07821f1.pdf]

## Supplementary Material

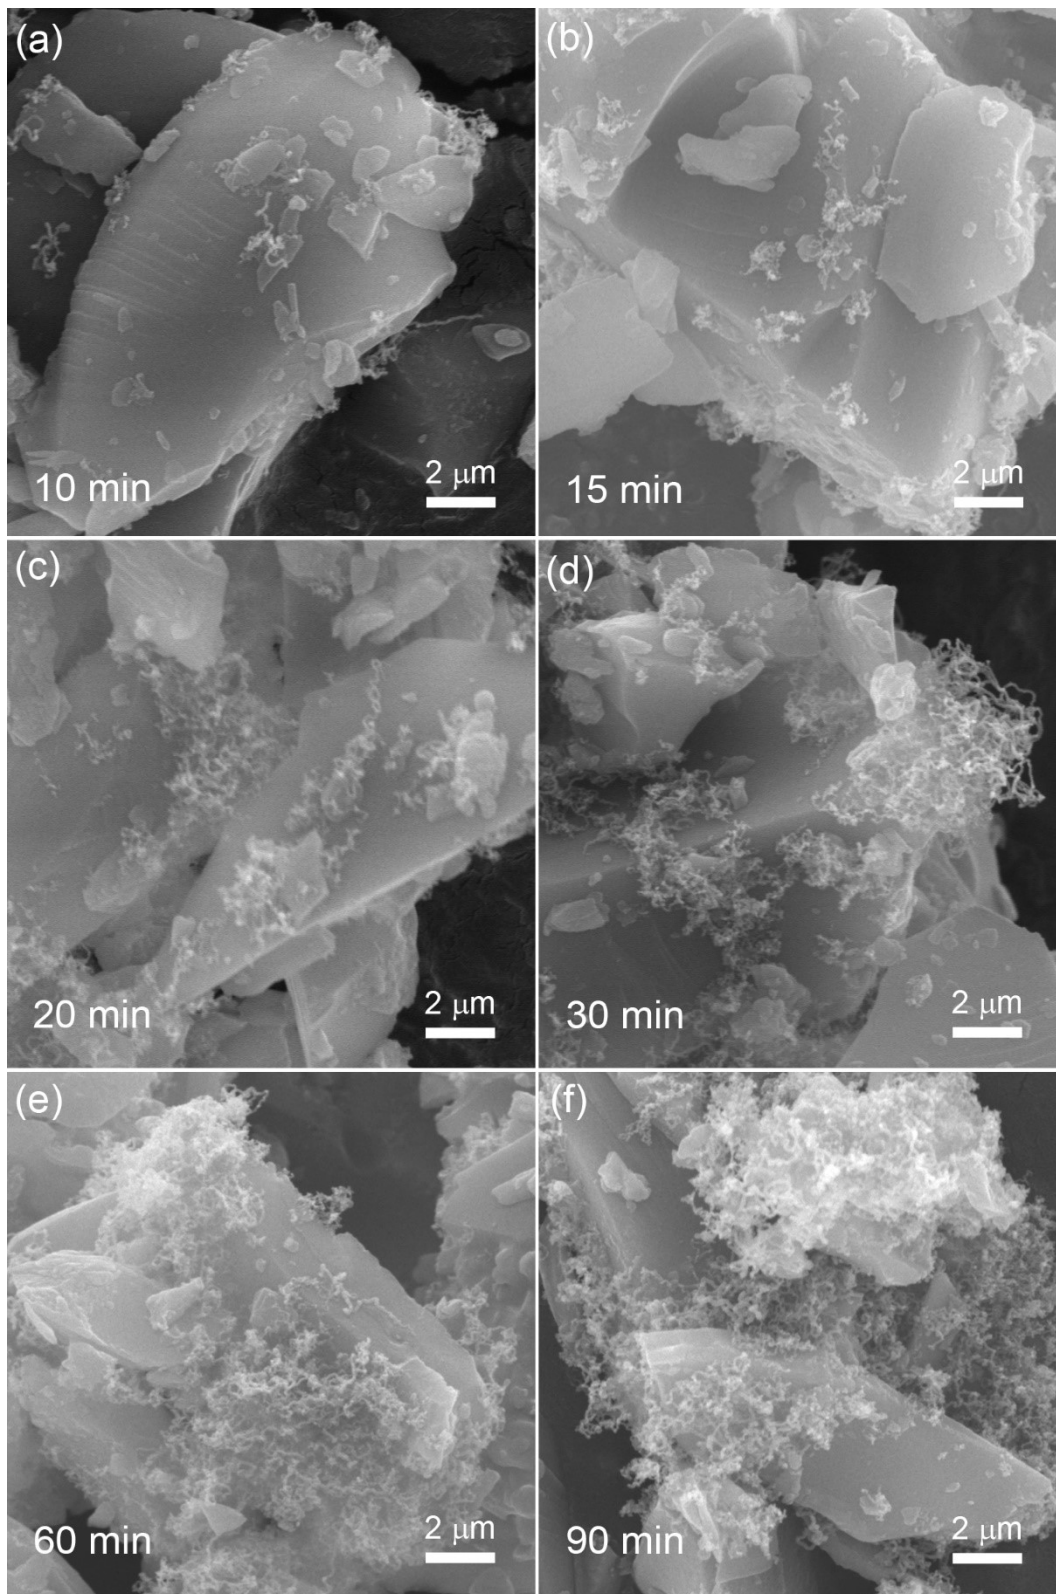

Fig. S1. SEM images of SiO under different deposition times at 500 °C.

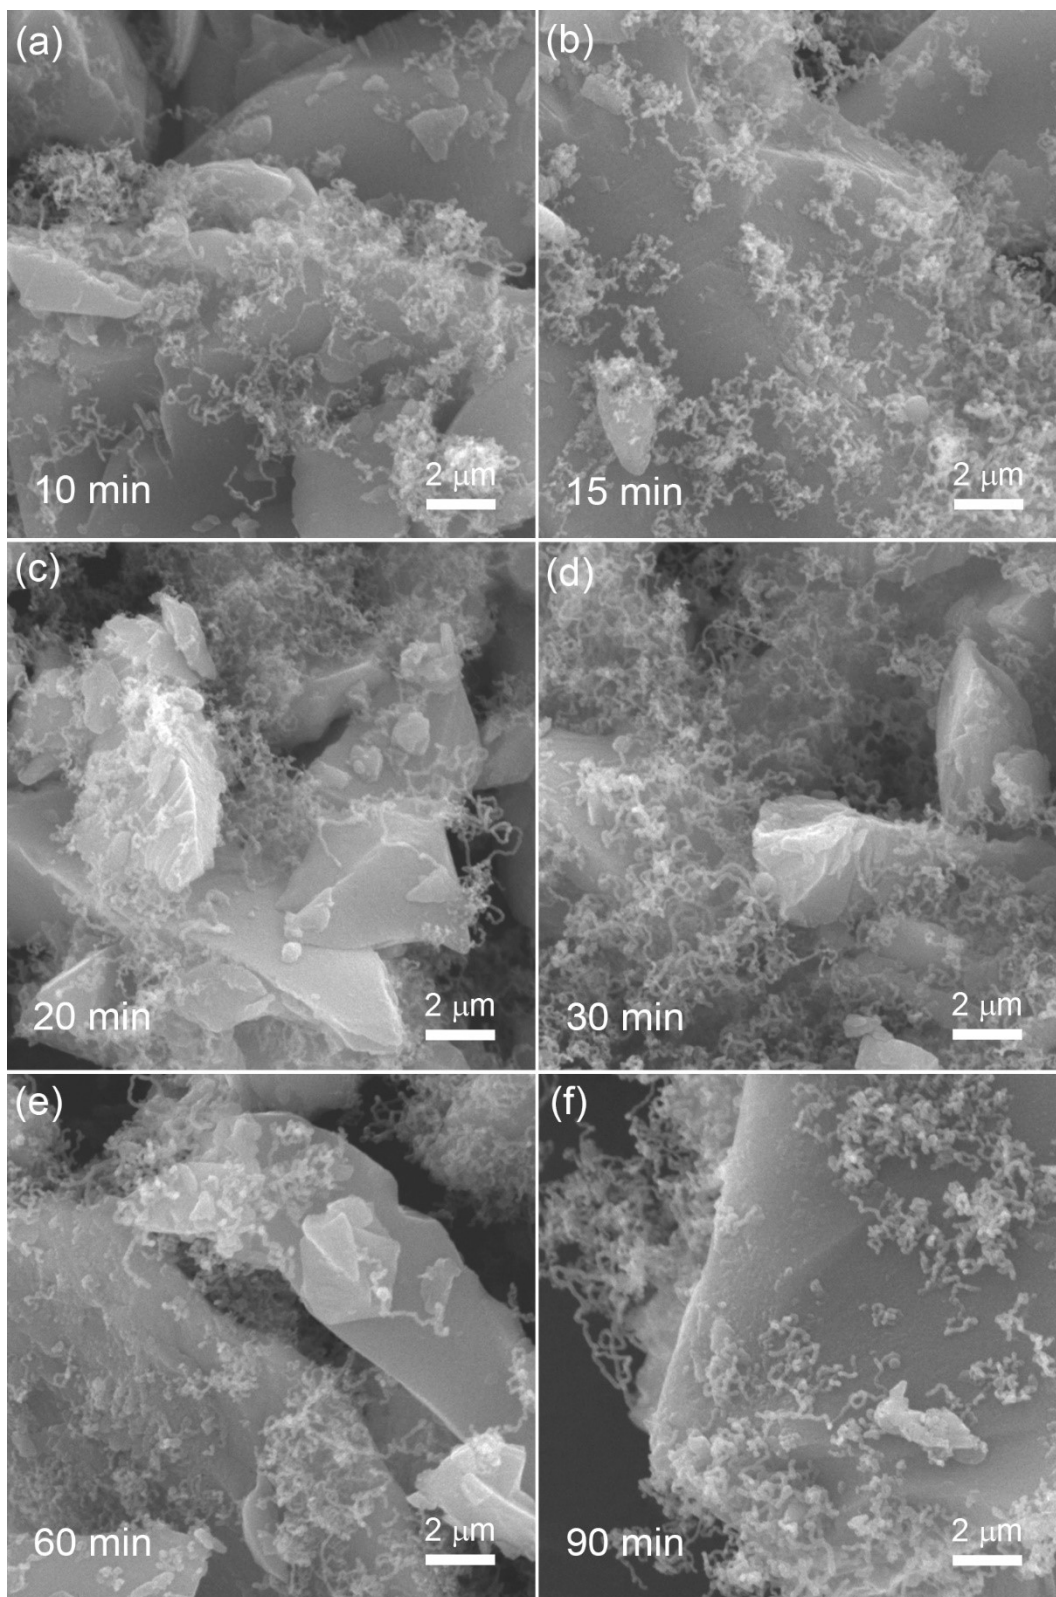

Fig. S2. SEM images of SiO under different deposition times at 600 °C.

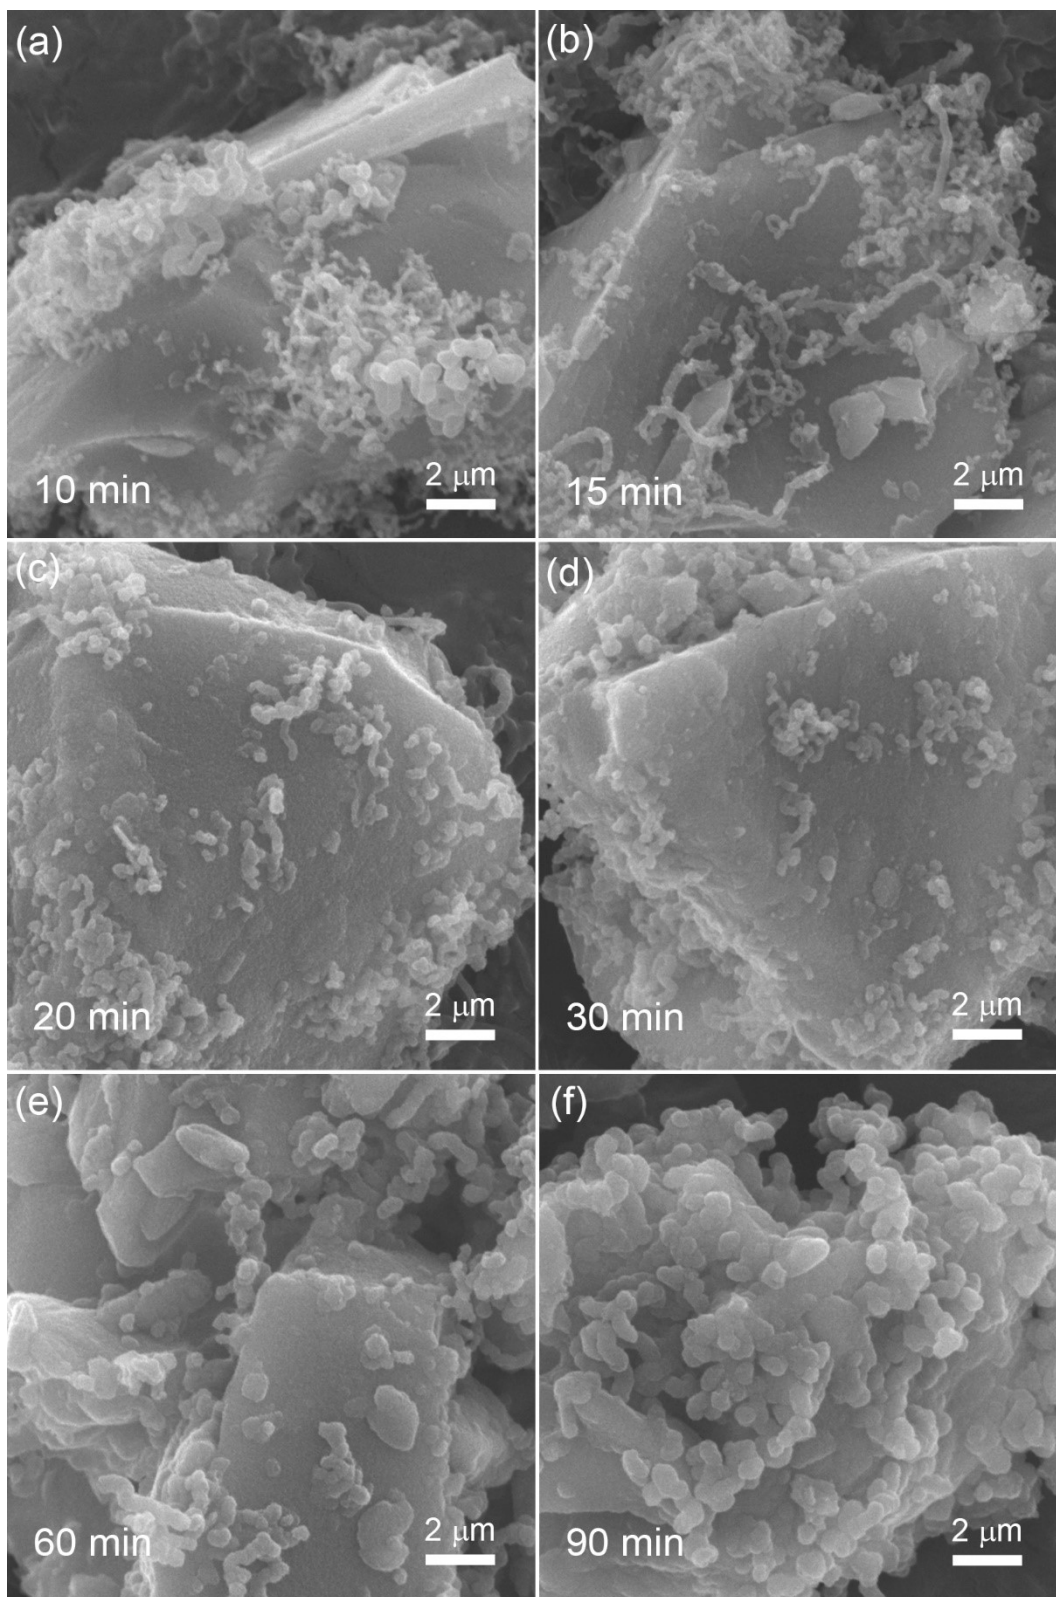

Fig. S3. SEM images of SiO under different deposition times at 700 °C.



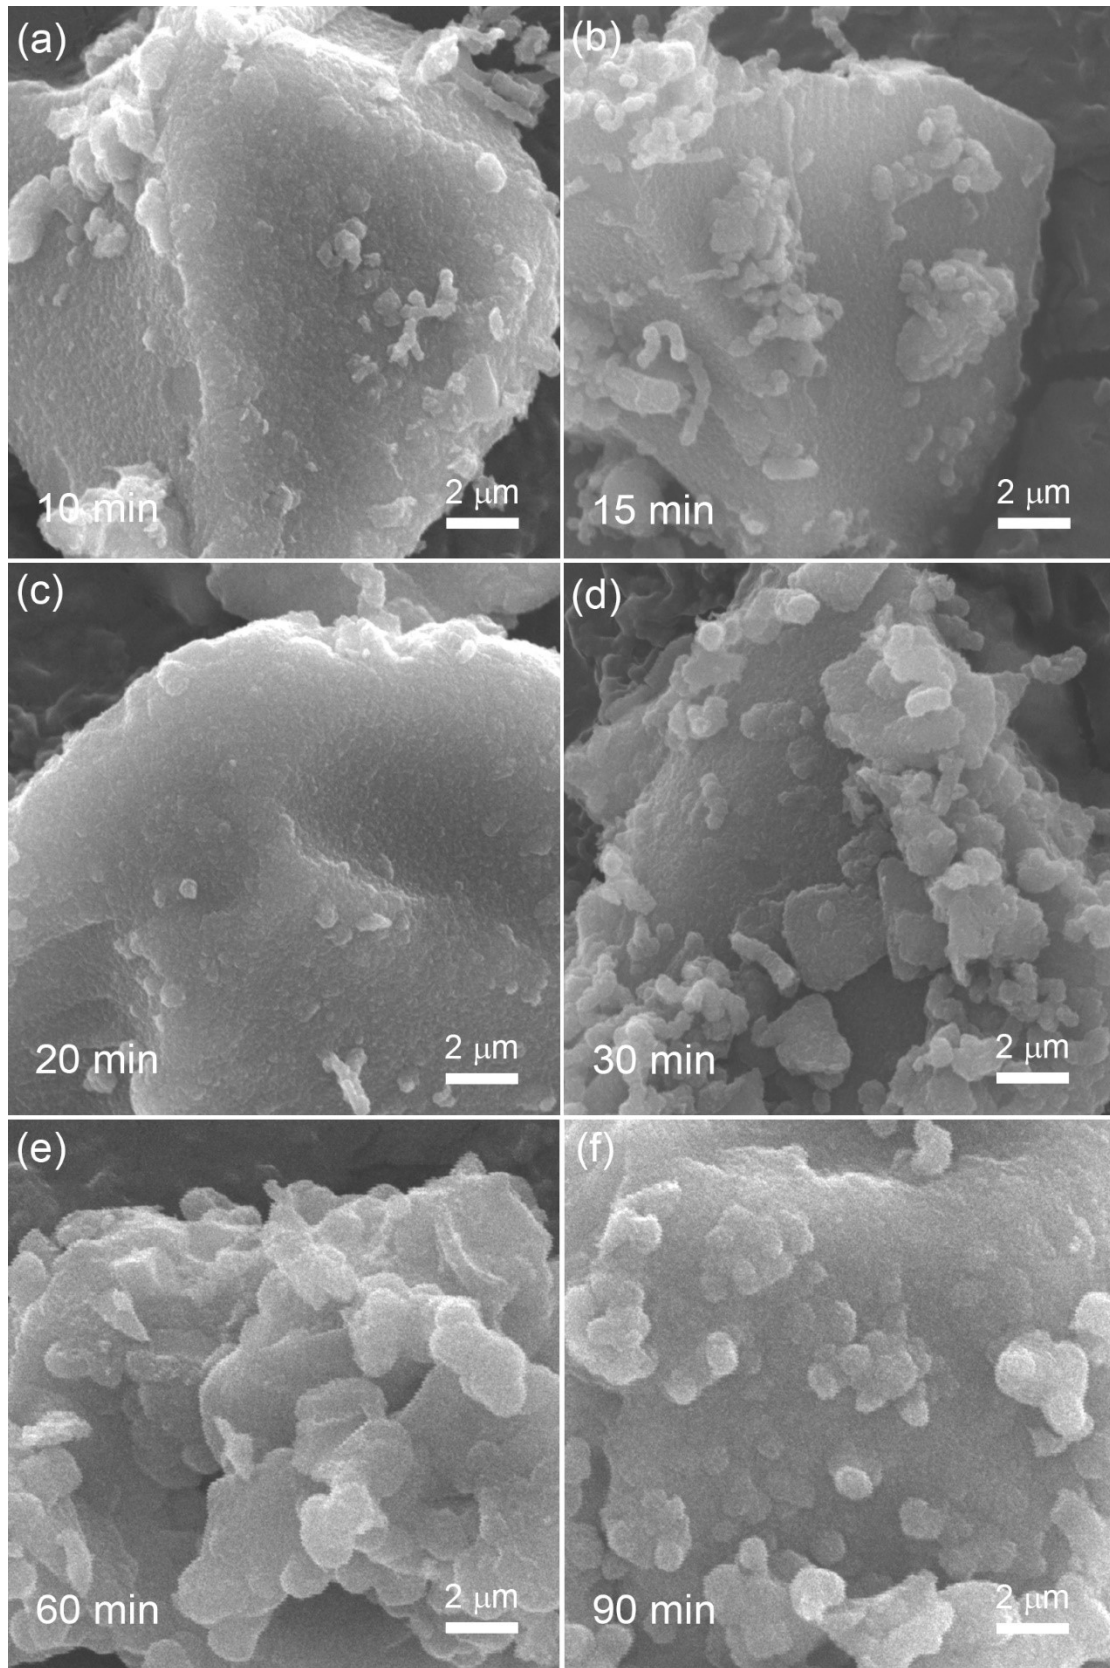

Fig. S4. SEM images of SiO under different deposition times at 800 °C.

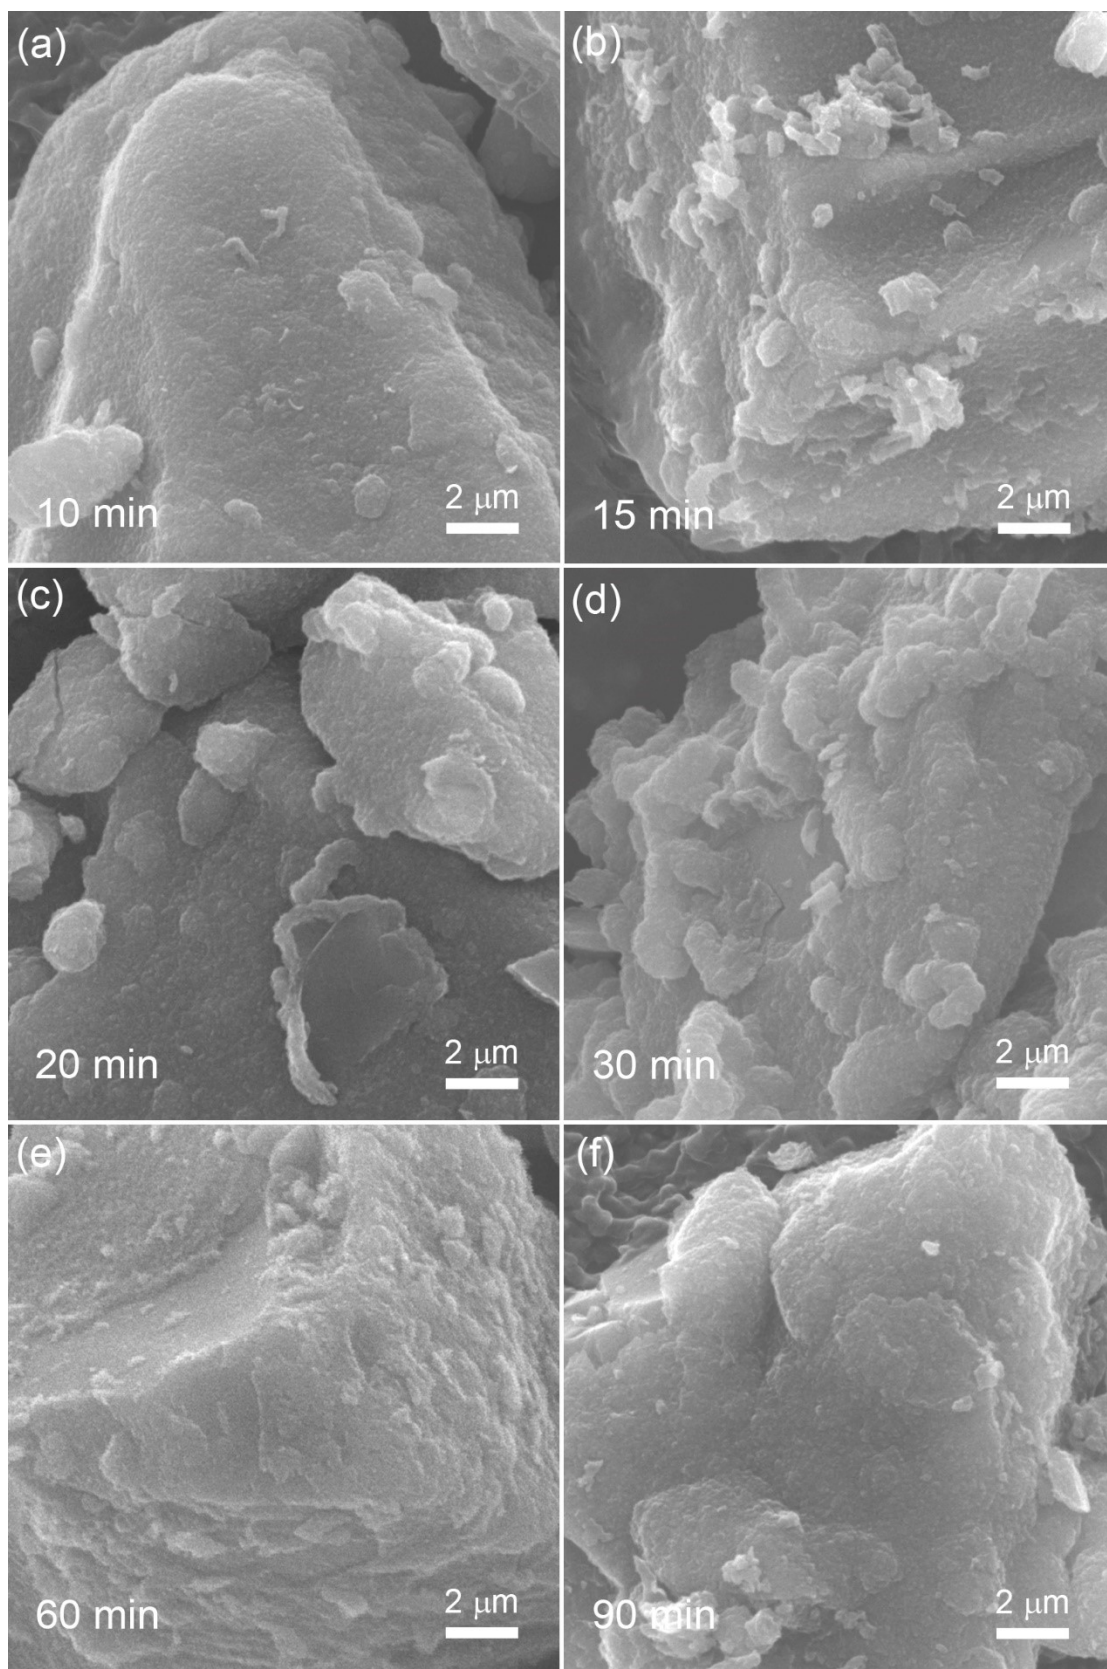

Fig. S5. SEM images of SiO under different deposition times at 900 °C.

Table S1 The 1D-C and a-C contents of different samples at 700 °C.

| Time (min) | 1D-C content (wt. %) | a-C content (wt. %) |
|------------|----------------------|---------------------|
| 10         | 1.96                 | 7.89                |
| 15         | 1.99                 | 9.81                |
| 20         | 2.01                 | 10.79               |
| 30         | 2.36                 | 17.24               |
| 60         | 2.88                 | 32.87               |
| 90         | 2.83                 | 37.67               |

The results in the table are derived from the following formula, which is corrected by the empirical formula in the literature [32]:

$$I_D/I_G = 1.821 - 0.1002x + 0.00367x^2 - 6.589E-5x^3 + 5.486E-7x^4 - 1.712E-9x^5$$

The term of x is the percentage of 1D-C in total carbon. According to the practical x, the numerical solution of  $I_D/I_G$  can be obtained. The total carbon content multiplied by x is the content of 1D-C.

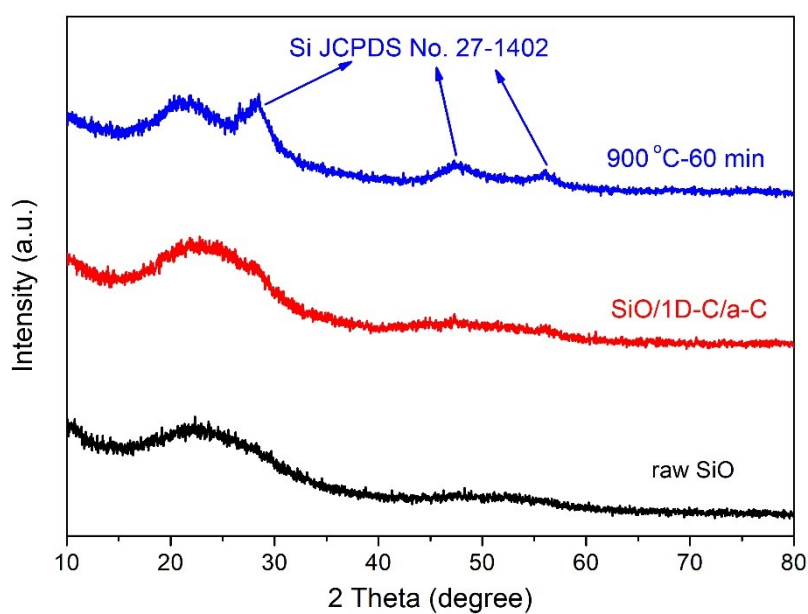

Fig. S6. XRD patterns of the raw SiO, the SiO/1D-C/a-C and the sample 900 °C-60 min.

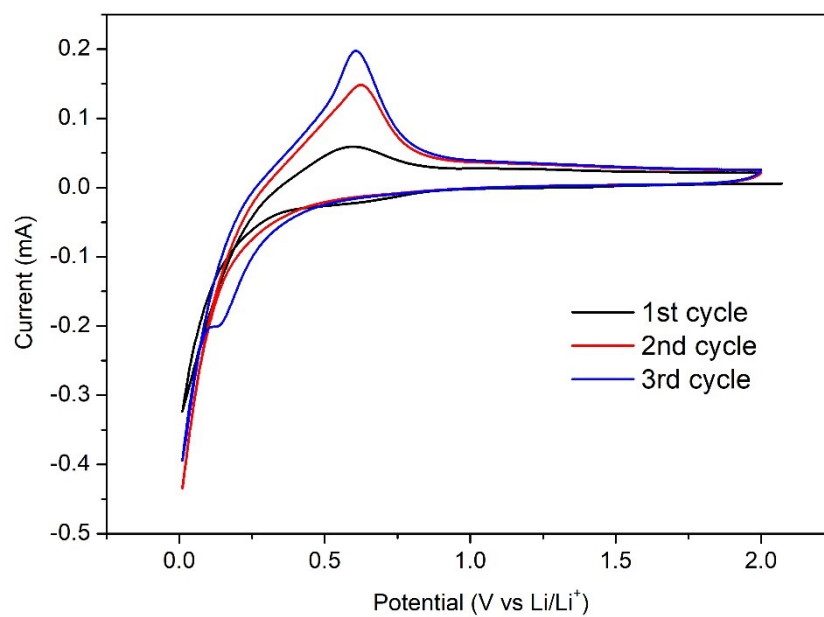

Fig. S7. CV curves of the raw SiO.

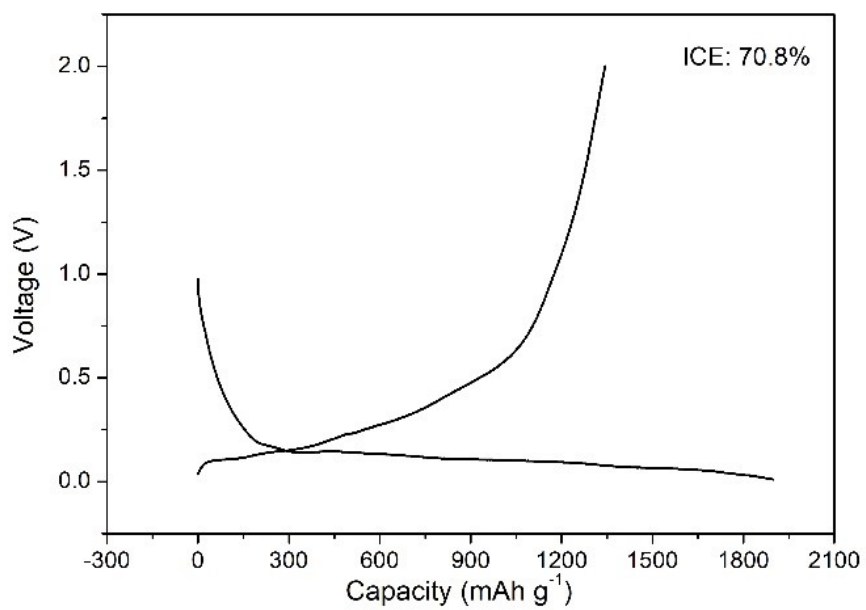

Fig. S8. Capacity-voltage curves of the raw SiO electrode.



Table S2. Carbon contents of sample different samples

| Order | Sample                        | Carbon content (wt. %) | Cycle retention@150cyc (%) |
|-------|-------------------------------|------------------------|----------------------------|
| 1     | 500 °C-90 min (SiO/1D-C)      | 7.50                   | 35.5                       |
| 2     | 700 °C-20 min (Dual Coated-1) | 12.92                  | 60.2                       |
| 3     | 700 °C-40 min (Dual Coated-2) | 25.10                  | 83.2                       |
| 4     | 700 °C-60 min (Dual Coated-3) | 35.31                  | 72.6                       |
| 5     | 900 °C-20 min (SiO/a-C)       | 22.42                  | 61.1                       |

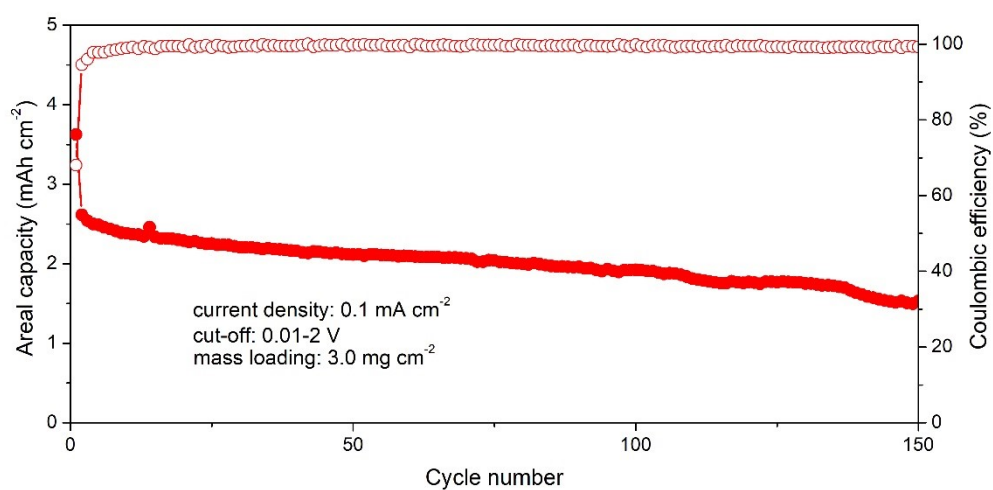

Fig. S9. Cycling performance of the SiO/1D-C/a-C electrodes with high mass loading.



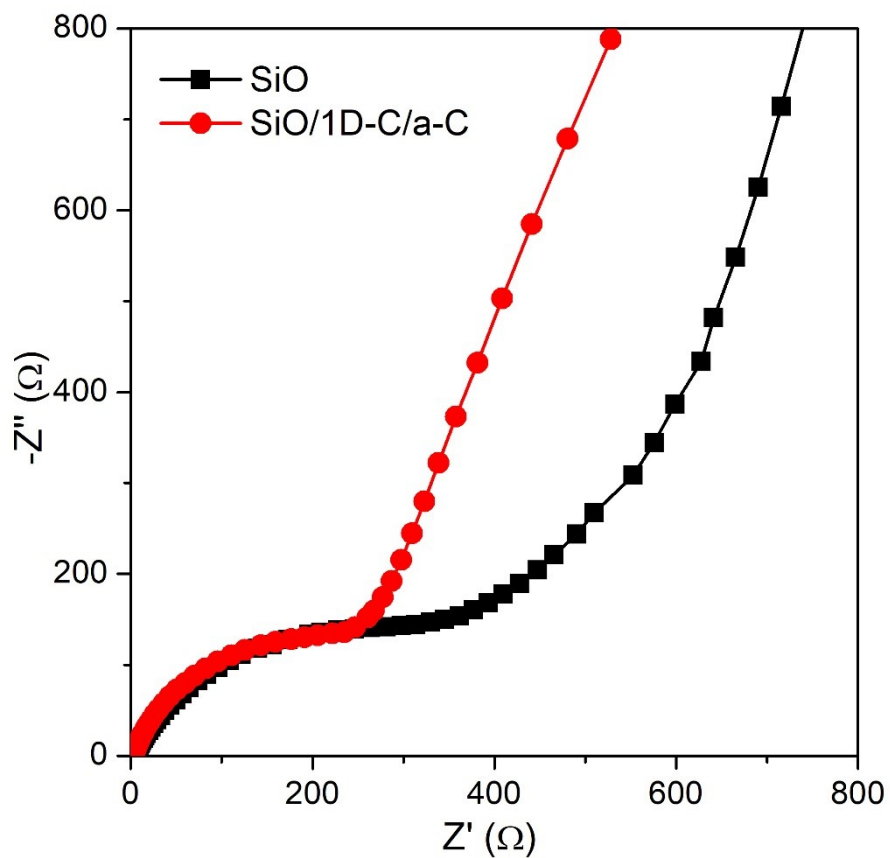

Fig. S10. EIS curves of the raw SiO and the SiO/1D-C/a-C electrodes in fresh stste.

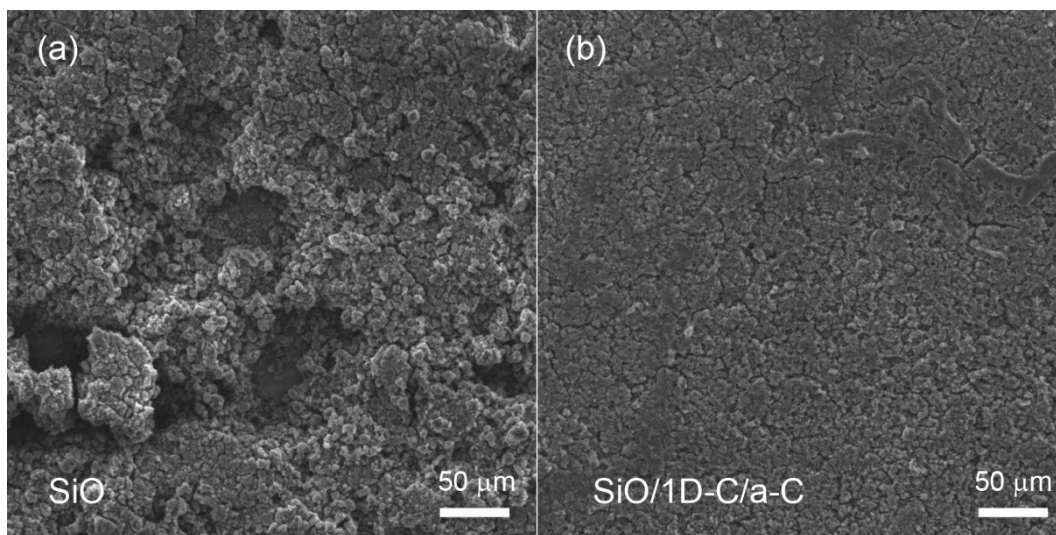

Fig. S11. SEM images of the surface morphology in the raw SiO (a) and SiO/1D-C/a-C (b) electrodes after 200 cycles.
